# Supplementary material
Source: Springer Nature journal article supplement (https://www.springermedizin.de/resource/supplementary/12865_2012_484_MOESM6_ESM.pdf/9428086)

**A***C. trachomatis*-negative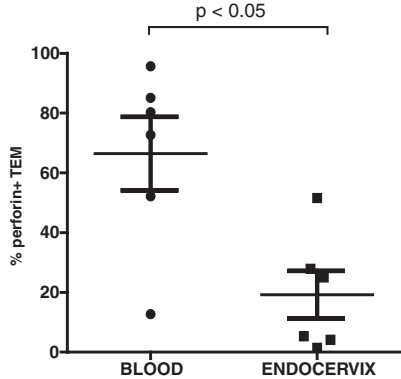**B**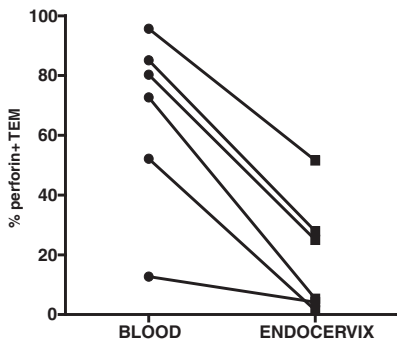**C***C. trachomatis*-positive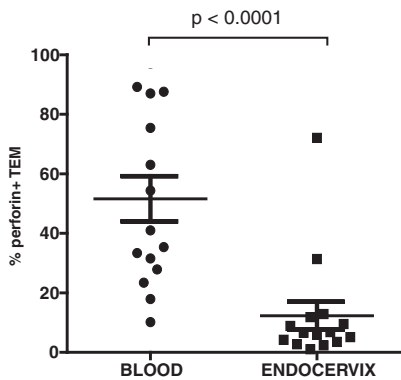

Supplement: MOESM6 [file 9428086]
